# Supplementary material for: Fabrication of an antibody-aptamer sandwich assay for electrochemical evaluation of levels of β-amyloid oligomers
Source: PubMed Central journal article supplement (PMC5057102; doi:10.1038/srep35186), 2016-10-11
Supplement: srep35186-s1.pdf [file srep35186-s1.pdf]

## Supporting Information

# **Fabrication of an antibody-aptamer sandwich assay for electrochemical evaluation of levels of $\beta$ -amyloid oligomers**

**Yanli Zhou<sup>1,2</sup>, Huanqing Zhang<sup>2</sup>, Lantao Liu<sup>1</sup>, Congming Li<sup>2</sup>, Zhu Chang<sup>1</sup>, Xu Zhu<sup>1</sup>, Baoxian Ye<sup>2</sup> & Maotian Xu<sup>1,2</sup>**

<sup>1</sup>Henan Key Laboratory of Biomolecular Recognition and Sensing, College of Chemistry and Chemical Engineering, Shangqiu Normal University, Shangqiu 476000 (P. R. China).

<sup>2</sup>College of Chemistry and Molecular Engineering, Zhengzhou University, Zhengzhou 450001 (P. R. China).

Correspondence and requests for materials should be addressed to L.L. (email: [liult05@iccas.ac.cn](mailto:liult05@iccas.ac.cn)) or M.X. (email: [xumaotian@sqnc.edu.cn](mailto:xumaotian@sqnc.edu.cn))

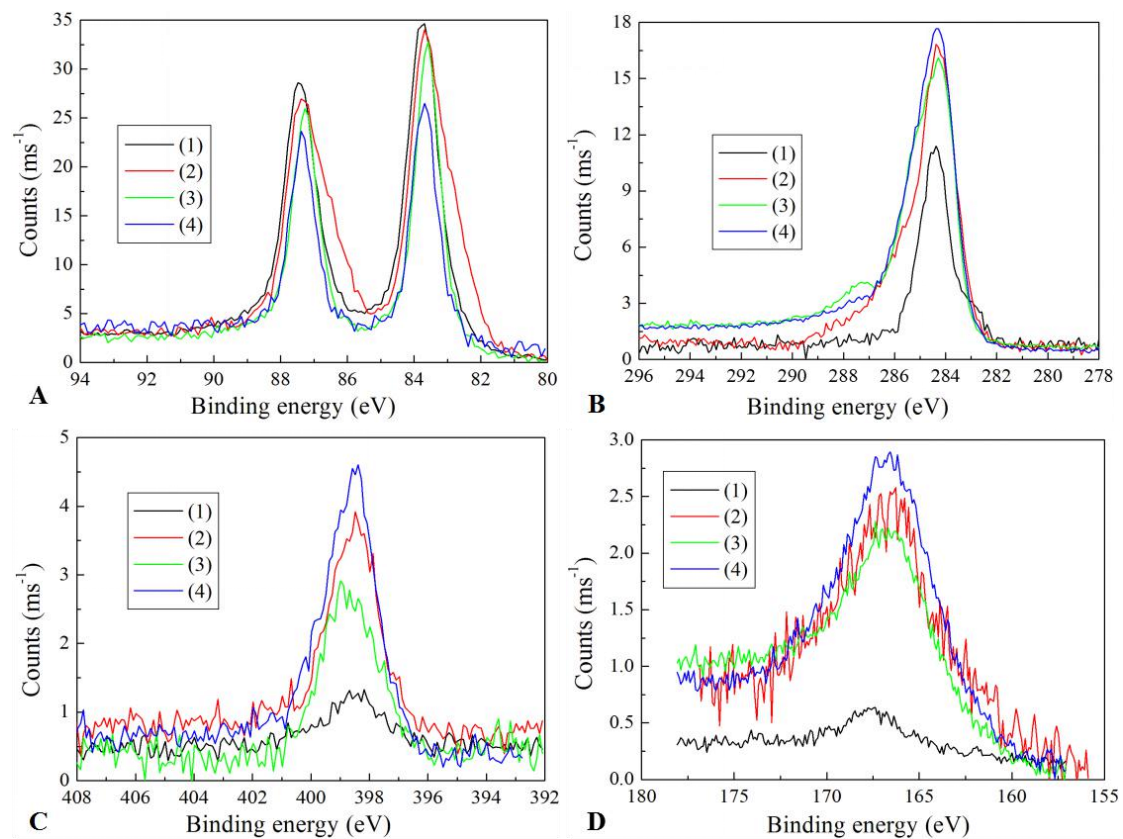

**Figure S1.** Au 4f (A), C 1s (B), N 1s (C), and S 2p (D) XPS spectra of AuNPs before (1) and after modification of Th (2), aptamer (3), and Th and aptamer (4).

| Method                    | Principle                                | Detection limit          | Advantage                        | Limitation                              | Refs.     |
|---------------------------|------------------------------------------|--------------------------|----------------------------------|-----------------------------------------|-----------|
| Electrochemical biosensor | peptide recognition                      | 0.048 nM                 | high sensitivity                 | low specificity                         | [7]       |
| Electrochemical biosensor | protein recognition                      | 0.5 pM                   | high sensitivity                 | low specificity                         | [8]       |
| Electrochemical biosensor | antibody recognition                     | not detected             | simplicity                       | nonspecific adsorption                  | [9]       |
| Localized SPR sensor      | antibody recognition                     | 100 fM                   | high sensitivity and simplicity  | nonspecific adsorption                  | [10]      |
| SPR biosensor             | antibody recognition                     | not detected             | simplicity                       | nonspecific adsorption                  | [11]      |
| Fluorescent sensor        | interaction with probe                   | not detected             | simplicity                       | low specificity                         | [12-16]   |
| Fluorescent sensor        | peptide recognition                      | 0.2 nM                   | high sensitivity and simplicity  | low specificity                         | [17]      |
| Fluorescent sensor        | interaction with probe                   | 3.57 nM                  | high sensitivity and simplicity  | low specificity                         | [18]      |
| Fluorescent sensor        | antibody recognition                     | 3 pg mL <sup>-1</sup>    | high sensitivity and simplicity  | nonspecific adsorption                  | [19]      |
| Fluorescent sensor        | peptide recognition                      | 1 nM                     | high sensitivity and simplicity  | low specificity                         | [20]      |
| SERS                      | nanofluidic biosensor                    | not detected             | high sensitivity and selectivity | expensive instrument, complex operation | [21]      |
| MS                        | laser-induced liquid bead ion desorption | not detected             | high sensitivity and selectivity | expensive instrument, complex operation | [23]      |
| ELISA                     | magnetic bead immunoassay                | 10.7 pg mL <sup>-1</sup> | high sensitivity and specificity | time-consuming operation                | [29]      |
| Electrochemical biosensor | antibody recognition                     | 100 pM                   | high sensitivity and selectivity | nonspecific adsorption                  | This work |

**Table S1.** Comparison of analytical characteristics for detection of A $\beta$  oligomers using various methods.
